# Supplementary material for: Genome-wide identification of long noncoding natural antisense transcripts and their responses to light in Arabidopsis
Source: HighWire-hosted journal article supplement (doi:10.1101/gr.165555.113), 2014-01-08
Supplement: Supplemental_Legends.docx [file Supplemental_Legends.docx]

**SUPPLEMENTAL FIGURE LEGENDS**

**Supplemental Figure 1. Classification of sense-antisense pairs.**

(A) Length distribution of lncNATs. X-axis gives the log10 value of lncNAT length (nt). (B) Three categories of NAT pairs. Red and blue arrows indicate sense and antisense transcripts, respectively, with transcriptional directions. (C) Pie chart shows percent of each group of NAT pairs in *Arabidopsis*.

**Supplemental Figure 2. Design of the ATH NAT custom array for expression profiling of NAT pairs.**

**Supplemental Figure 3. Correlation between signal intensities of Agilent spike-in probes and their relative concentrations.**X-axis gives log10 value of relative RNA concentrations and Y-axis gives log10 value of signal intensity for each spike-in probe. The top row presents correlation of spike-in probes in 3 root samples, the middle row for 3 leaf samples and the bottom row for 3 inflorescence samples.**Supplemental Figure 4. Correlation between biological replicates of inflorescences.**X-axis and Y-axis give log2 value of normalized signal intensity. Rep1, replicate 1; Rep2, replicate 2; Rep 3, replicate 3.

**Supplemental Figure 5. Expression level of lncNATs.**

Expression accumulative frequency of mRNAs (green line), pre-miRNAs (red line), lncNATs (blue line), and transposable element transcripts (grey line) in leaves (A) and inflorescences (B). X-axis presents log2 value of normalized signal intensity and Y-axis presents accumulative frequency.

**Supplemental Figure 6. Phenotypes of WT seedlings grown in darkness and under white light conditions.**

Bar = 50 mm.

**Supplemental Figure 7. Organ-preferential expression of light-regulated mRNAs.**

Venn diagrams show the number of light-regulated transcripts in each organ.

**Supplemental Figure 8. Validation of light-responsive lncNATs by qRT-PCR.**

(A) Signal intensity of light-responsive lncNAT. (B) Relative expression level of light-responsive lncNAT. Error-bar gives standard error (SE, n = 3). Bar plot represents relative expression level of lncNAT. C, cotyledon; H, hypocotyl; R, root. D, dark; 1, 1h light; 6, 6h light.

**Supplemental Figure 9. Heat map of discordant NAT pairs at 6h.**Expression levels of discordant (negatively-correlated) sense and antisense transcripts in 6h cotyledons (C), hypocotyls (H) and roots (R).

**Supplemental Figure 10. Correlation between 9 histone modifications and sense/antisense transcripts with complementary sequences at the 3’ end.**

Chromatin states were ordered by the number of transcripts in each group.

**SUPPLEMENTAL TABLES**

**Supplemental Table 1. Newly-identified Arabidopsis NAT pairs and their coding potential.**

**a. Genomic coordinates of NAT pairs in Arabidopsis**

**b. Coding potential of NAT pairs in Arabidopsis**

**Supplemental Table 2. Sample size of strand-specific RNA-seq.**

**Supplemental Table 3. Primer for detection of lncNATs by qRT-PCR.**

**Supplemental Table 4. GO term enrichment of gene encoding NAT pairs at 1h and 6h.a. GO term enrichment of gene encoding discordant NAT pairs at 1h and 6h**

**b. Transcription factors encoding 1h light-responsive discordant NAT pairs**

**c. GO term enrichment of gene encoding concordant NAT pairs at 1h and 6h**

**Supplemental Table 5. Histone modification of light-regulated NATs.Supplemental Table 6. NAT pairs with smRNAs derived from complementary regions.**

**Supplemental Table 7. Comparison with previously reported NAT pairs**

**a. NAT pairs reported by Wang *et al*. 2005 and covered by this study**

**b. NAT pairs reported by Matsui *et al.* 2008 and covered by this study**

**c. NAT pairs reported by Okamoto *et al.* 2010 and covered by this study**

**d. NAT pairs reported by Hazen *et al.* 2009 and covered by this study**

**e. NAT pairs reported by Li *et al.* 2013 and covered by this study**
